# Supplementary material
Source: PubMed Central journal article supplement (PMC2898292)
Supplement: supp_M110.130591_jbc.M110.130591-1.pdf [file supp_M110.130591_jbc.M110.130591-1.pdf]

## **SUPPLEMENTAL DATA**

### **Regulation of Aurora B kinase by the lipid raft protein Flotillin-1**

Valentí Gómez, Marta Sesé, Anna Santamaría, Juan D. Martínez, Elisabet Castellanos, Marta Soler, Timothy M. Thomson & Rosanna Paciucci

**Content:** 10 Supplemental Figures with Figure Legends

## Supplemental Figure S1

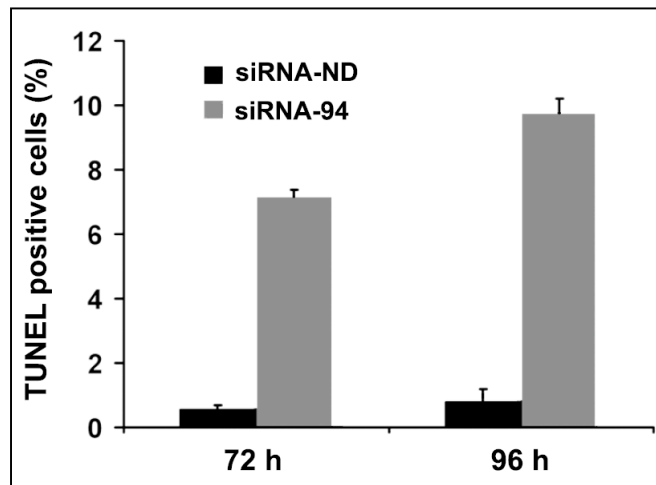

**Figure S1.** Apoptosis induced by siRNA depletion of Flotillin-1 72 and 96 h after transfection. Shown is the percentage of TUNEL-positive HeLa cells. \*,  $P < 0.05$  (Student's t-test).

## Supplemental Figure S2

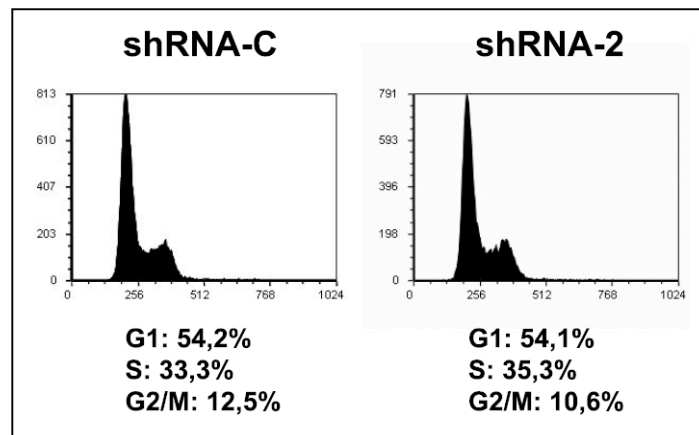

**Figure S2.** Cell cycle analysis of cells depleted of Flotillin-1 by shRNA-2 and control shRNA-C cells. Control and Flotillin-1 depleted cells ( $1 \times 10^6$  cells) were trypsinized, washed, and incubated with propidium iodide (25  $\mu\text{g/ml}$ ) and analyzed for DNA content. One representative experiment of two performed in duplicate samples is shown.

### Supplemental Figure S3

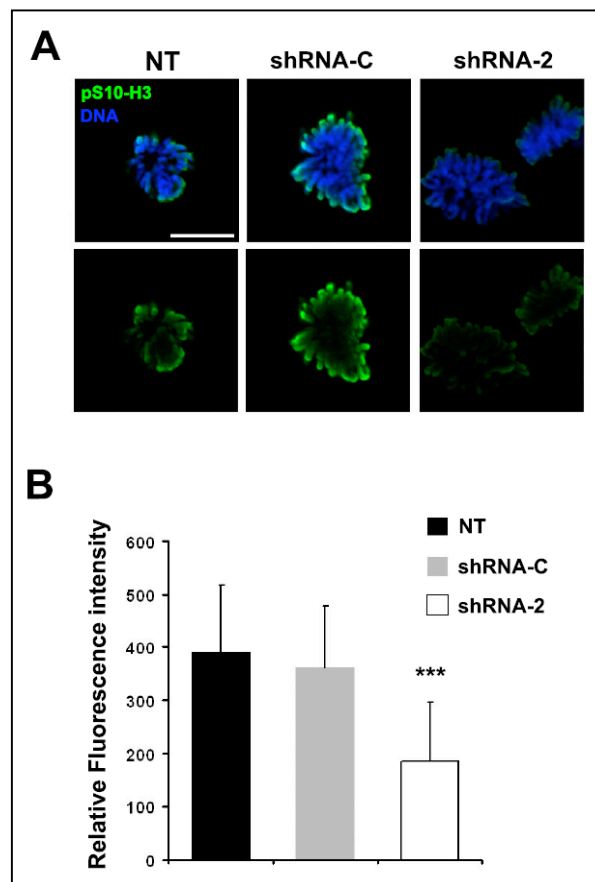

**Figure S3.** Flotillin-1 depletion causes a decline in total phospho-histone H3 (Ser10). A) Cells transduced with shRNA-2 or control shRNA were stained for pS10-H3 and DNA (Hoechst 33258) and analyzed by confocal microscopy. Scale bar, 10 $\mu$ m. B) 20 to 30 cells for each experimental condition were selected and analyzed individually. Average fluorescence intensity and area values were obtained and integration of both parameters was considered the total fluorescence level per cell. Results are shown as the mean and standard deviation for each group of values. \*\*\*,  $P < 0.001$ .

## Supplemental Figure S4

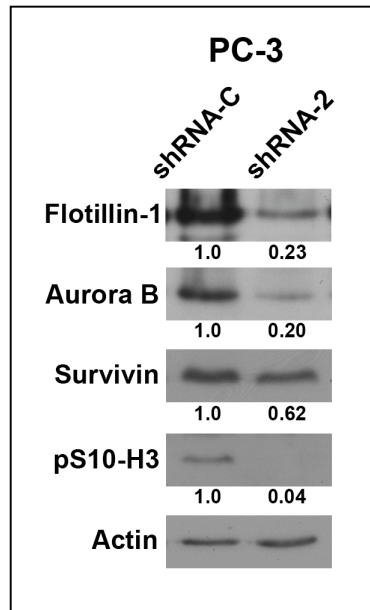

**Figure S4.** Knockdown of Flotillin-1 in PC-3 prostate cancer cells affects Aurora B protein levels and activity. PC-3 cells were treated with shRNA-2 or control and equal amount of cell lysates (30  $\mu$ g) were analyzed by Western blotting with the indicated antibodies. Actin is used for normalization of protein levels.

## Supplemental Figure S5

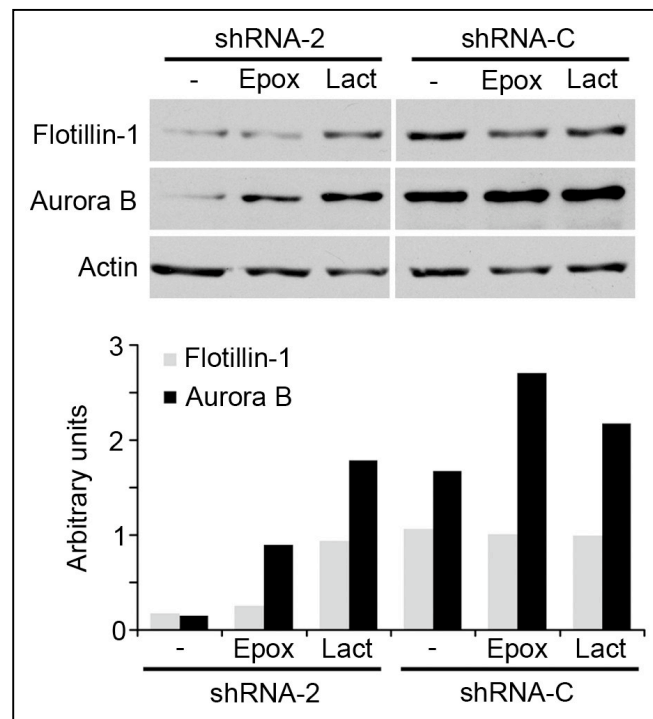

**Figure S5.** Treatment with proteasome inhibitors (1 $\mu$ M epoxomycin or lactacystin) for 2 h prevents the downregulation of Aurora B caused by Flotillin-1 knockdown. The two panels are from the same original experiment. Bottom panel: quantification of normalized Western blotting signals of Aurora B and Flotillin-1 by scanning densitometry.

## Supplemental Figure S6

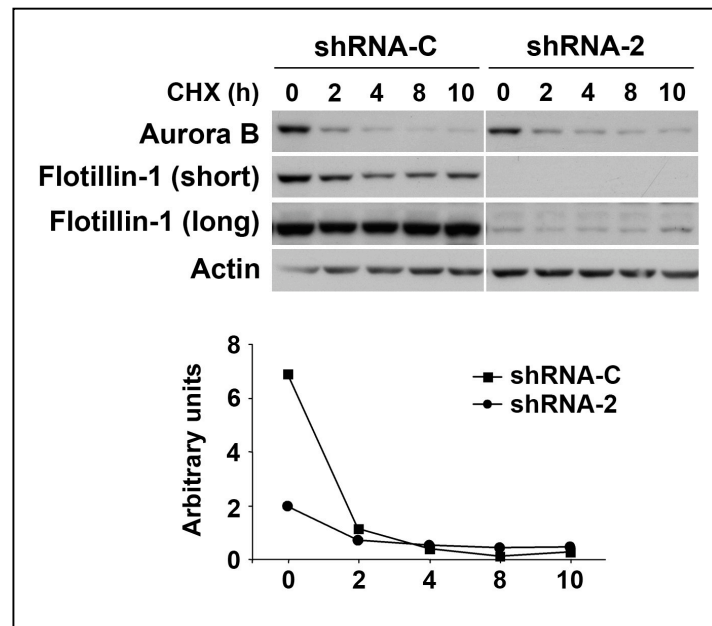

**Figure S6.** Cells depleted for Flotillin-1 and controls were treated with cycloheximide (100  $\mu\text{g/ml}$ ) for indicated periods and equal amounts of protein extracts (30  $\mu\text{g}$ ) were analyzed by Western blotting. Bottom panel: quantification of normalized Western blotting signals for Aurora B and Flotillin-1 by scanning densitometry. The estimated Aurora B half-life was 1.7 h in control cells and 1.75 h in Flotillin-1-depleted cells .

# Supplemental Figure S7

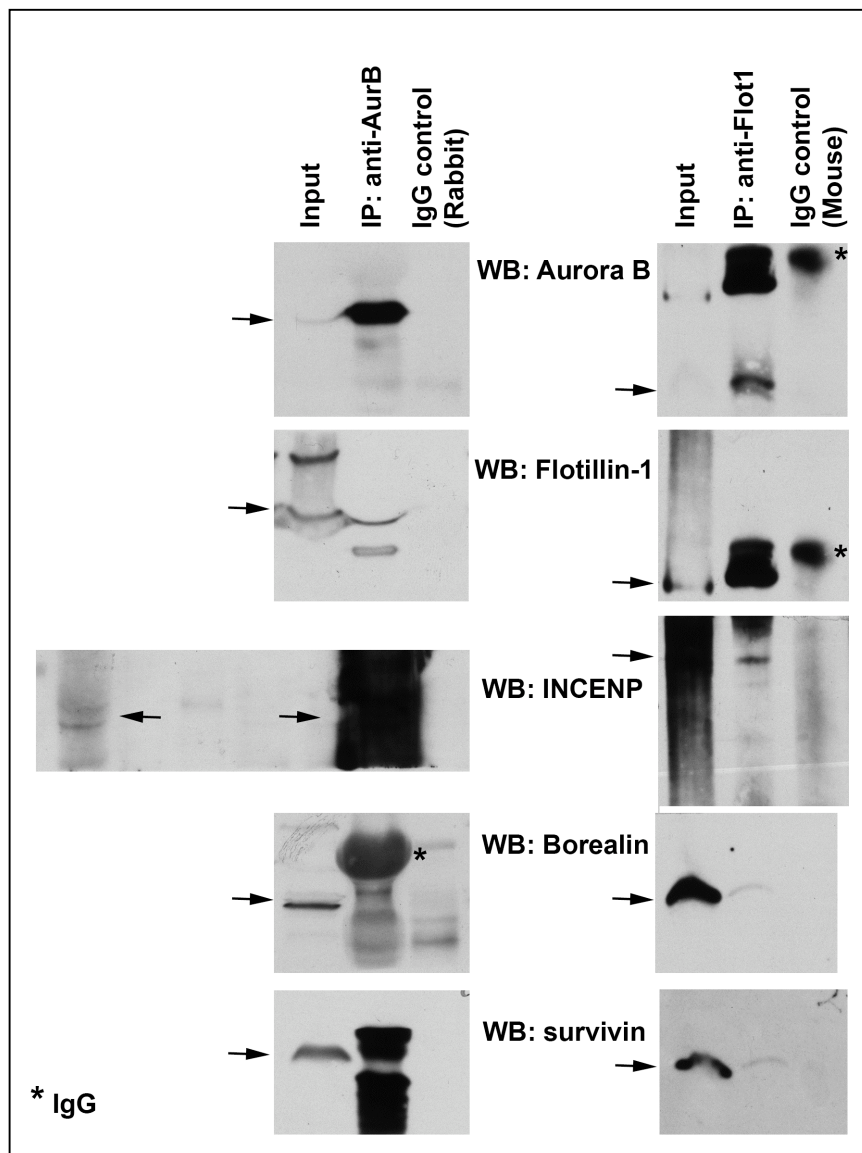



## Supplemental Figure S8

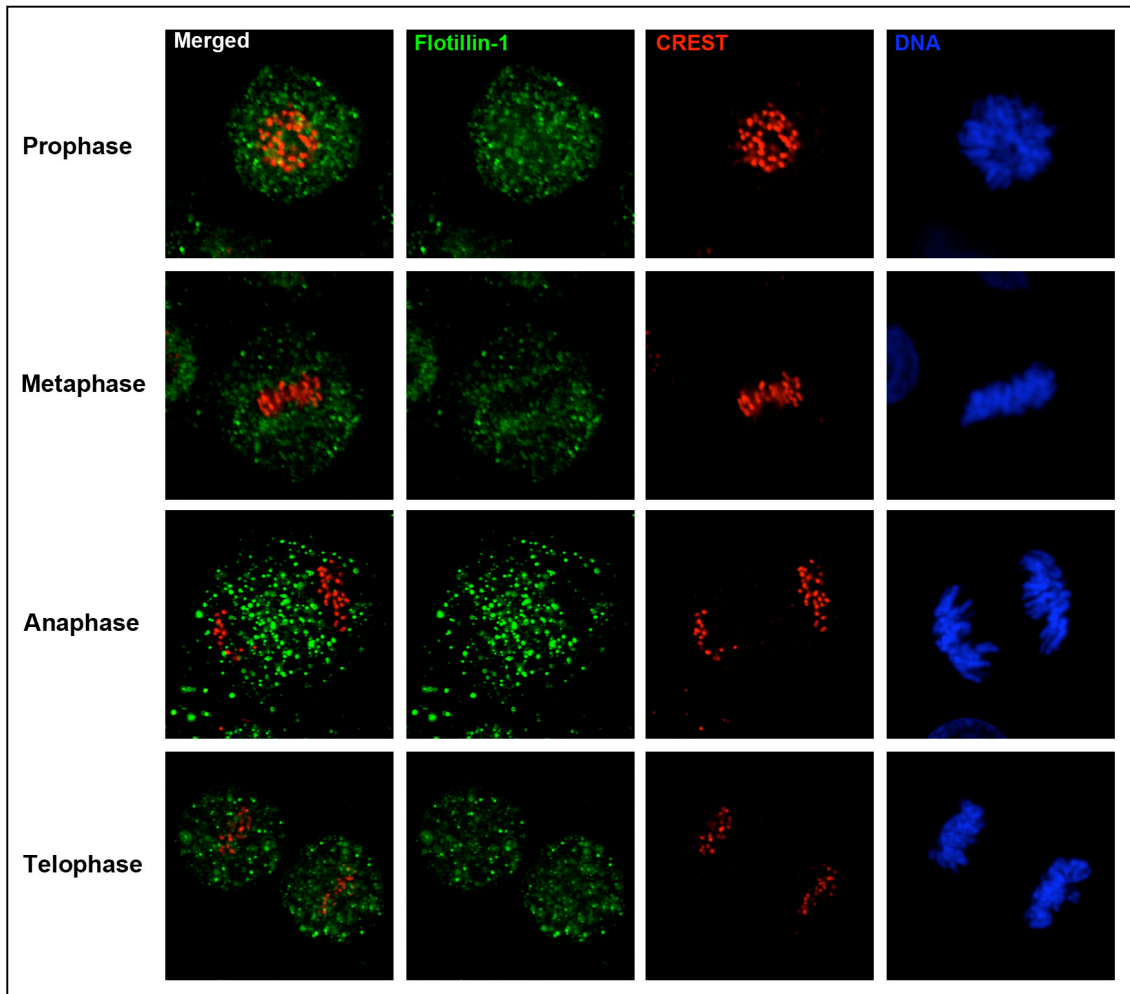

**Figure S8.** Localization of Flotillin-1 in mitotic HeLa cells. Cells were stained with antibody to Flotillin-1 (green) and with serum from a patient with CREST to identify kinetochores (red). DNA was stained with Hoechst 33258 and images captured by confocal microscopy. Shown are examples of stained cells in different phases of mitosis.

## Supplemental Figure S9

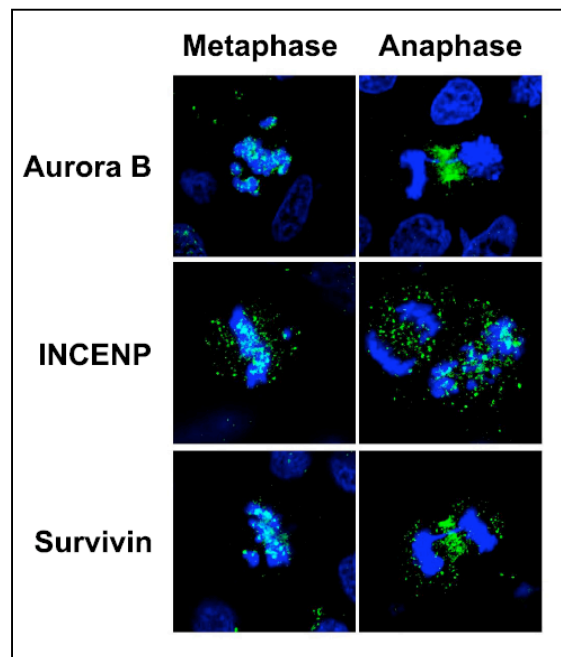

**Figure S9.** Localization of Aurora B, INCENP and survivin in mitotic HeLa cells depleted of Flotillin-1. DNA was stained with Hoechst 33258 (blue) and images captured by confocal microscopy. Images from cells in metaphase and anaphase show that localization of CPC proteins is as expected, in spite of the aberrant chromosome segregation.

## Supplemental Figure S10

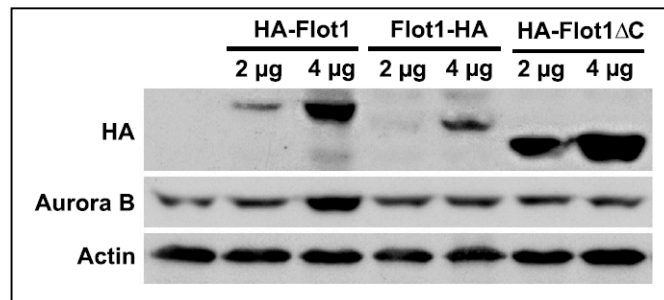

**Figure S10.** Overexpression of forms of Flotillin-1 that retain their capability of nuclear localization (HA-Flot1), but not of forms defective in nuclear localization (Flot1-HA and HA-Flot1ΔC), increased Aurora B protein levels. HeLa cells transfected with the indicated plasmids were analyzed by Western blotting with indicated antibodies. Signal for actin was used as control for protein loadings.
